1 **Title**

2 Conservation and host-specific expression of non-tandemly repeated heterogenous ribosome  
3 RNA gene in arbuscular mycorrhizal fungi

4

5 Running title

6 Conservation and expression of mycorrhizal rDNA

7

8 Authors

9 Taro Maeda<sup>\*1</sup>, Yuuki Kobayashi<sup>1</sup>, Tomomi Nakagawa<sup>1</sup>, Tatsuhiro Ezawa<sup>2</sup>, Katsushi

10 Yamaguchi<sup>3</sup>, Takahiro Bino<sup>3</sup>, Yuki Nishimoto<sup>3</sup>, Shuji Shigenobu<sup>3</sup> & Masayoshi Kawaguchi<sup>\*1</sup>

11

12

13 Affiliation

14 1 Division of Symbiotic Systems, National Institute for Basic Biology, Nishigonaka 38,

15 Myodaiji, Okazaki, Aichi, Japan

16

17 2 Graduate School of Agriculture, Hokkaido University, Sapporo, Japan

18

19 3 Functional Genomics Facility, National Institute for Basic Biology, Nishigonaka 38,

20 Myodaiji, Okazaki, Aichi, Japan

21

22 \*Corresponding author

23

24

25 Email addresses:

26 TM: [maedat@nibb.ac.jp](mailto:maedat@nibb.ac.jp)

27 YK: [kobayasi@nibb.ac.jp](mailto:kobayasi@nibb.ac.jp)

28 TN: [nkgwtmm@nibb.ac.jp](mailto:nkgwtmm@nibb.ac.jp)

29 TE: [tatsu@res.agr.hokudai.ac.jp](mailto:tatsu@res.agr.hokudai.ac.jp)

30 KY: [kyamaguc@nibb.ac.jp](mailto:kyamaguc@nibb.ac.jp)

31 TB: [binob@nibb.ac.jp](mailto:binob@nibb.ac.jp)

32 YN: [nynishi@nibb.ac.jp](mailto:nynishi@nibb.ac.jp)

33 SS: [shige@nibb.ac.jp](mailto:shige@nibb.ac.jp)

34 MK: [masayosi@nibb.ac.jp](mailto:masayosi@nibb.ac.jp)

35

## 36 Abstract

37       The ribosomal RNA-encoding gene (rDNA) has a characteristic genomic nature: tens to  
38 thousands of copies in a genome, tandemly repeated structure, and intragenomic sequence  
39 homogeneity. These features contribute to ribosome productivity via physiological and  
40 evolutionary processes. We reported previously the exceptional absence of these features in  
41 the model arbuscular mycorrhizal (AM) fungus *Rhizophagus irregularis*. Here we examine  
42 the phylogenetic distribution of the exceptional rDNA features in the genus *Rhizophagus* via  
43 improving the genome sequence of *R. clarus*. Cross-species comparison indicated similarity  
44 of their rDNAs not only in the genomic features but also in the distribution of intragenomic  
45 polymorphic sites on the paralogs. Ribosomal RNA comprises multiple domains with  
46 different functions. The two *Rhizophagus* species commonly exhibited a variation enrichment  
47 site, ES27L, which is related to translational fidelity and antibiotic sensitivity. Variation  
48 enrichment on ES27L has not been observed in other organisms lacking the three rDNA  
49 features such as malaria parasites and *Cyanidioschyzon merolae*. Expression profiling of  
50 rDNAs in *R. irregularis* revealed that rDNA paralogs are expressed differently in association  
51 with host plant species. Our results suggest a broad distribution of the disarranged rDNA  
52 across AM fungi and its involvement in the successful association with the broad range of  
53 host species.

54

## 55 Introduction

56 Ribosome heterogeneity was first proposed by Francis Crick as the “one gene–one  
57 ribosome–one protein” hypothesis in 1958 [1]. This hypothesis, where a different type of  
58 ribosome translates each protein, vacillated within a few years, and the idea that “all  
59 ribosomes are exactly the same” became prevalent [2]. However, recent evidence of  
60 heterogeneous ribosomes in various organisms (e.g., humans, mouse, yeast, *Arabidopsis*, fruit  
61 flies, zebrafish, and malaria parasites) rekindled the notion that ribosome is an additional  
62 regulatory layer of gene expression [2–4]. Although a number of studies have reported the  
63 correlation between tissue- and cell stage-specific phenotypes and specialized ribosomes, the  
64 detailed expression control mechanisms and evolutionary contributions of this heterogeneity  
65 remain ambiguous [2–4]. Notably, the importance and distribution of the heterogeneity of the  
66 ribosomal RNA (rRNA) remain an open question. The reliable sequencing and  
67 mutant/transformant construction of the 18S–5.8S–28S ribosomal RNA-encoding loci (48S  
68 rDNA) have been technically challenging due to their large copy number (CN) and tandem  
69 repetitive structure (TRS) [2].

70 In the previous genomic study of the 48S rDNA in the model arbuscular mycorrhizal  
71 (AM) fungus *Rhizophagus irregularis* DAOM-181602, we unexpectedly found (1) a small  
72 copy number (around ten copies), (2) the absence of TRS, (3) and intragenomic heterogeneity  
73 [5]. AM fungi belong to the subphylum Glomeromycotina [6] and form symbiotic  
74 associations with most land plants [7, 8], and to date, up to 300 species have been described  
75 [9]. The association was established in the early Devonian and contributed to plant  
76 terrestrialization via enhancing nutrient uptake [10, 11]. AM fungi colonize plant roots and  
77 construct extensive hyphal networks in the soil and deliver essential nutrients to the host plant.  
78 AM fungi show no apparent host specificity; they are capable of colonizing different plant

79 functional groups, that is, autotrophic and heterotrophic plants, and connect them via the  
80 underground mycelial networks in the field [12, 13].

81 According to the recent ideas for the physiological contribution of ribosome  
82 heterogeneity in eukaryotes [2–4], it is hypothesized that the ribosome polymorphisms in *R.*  
83 *irregularis* assist adaptation to diverse environments and facilitate a broad host range via  
84 translational modifications [5]. The absence of the TRS of rDNA may allow us to elucidate  
85 not only the evolutionary mechanisms underlying the conservation of the TRS in the majority  
86 of eukaryotes but also those for overcoming the difficulty in rDNA mutation/transformation  
87 construction. However, the unique features of AM fungal rDNA have only been discovered  
88 very recently [5, 14], and the extent of the features in the Glomeromycotina still remains  
89 unexplored. Although genome sequences have recently been published in several species,  
90 including *R. clarus*, *Glomus cerebriforme*, *R. diaphanous*, *Gigaspora rosea*, *G. margarita*,  
91 and *Claroideoglomus claroideum* [15–18], the genomic structure of rDNA has been unclear  
92 except in *R. irregularis*, which is due to, at least partially, the difficulty in constructing  
93 genome assemblies long enough for the analysis of the rDNA structure.

94 To examine the nature of AM fungal rDNA in greater detail, we improved the genome  
95 data of *R. clarus* HR1 and analyzed whether *R. clarus* HR1 shares the three rDNA features  
96 and polymorphic sites with *R. irregularis* via cross-species comparison. Subsequently, we  
97 performed PacBio circular consensus sequencing (CCS) [19], which generates accurate long-  
98 read sequences, for profiling the expression of different rDNA paralogs in association with  
99 the environmental condition.

100

## 101 **Results**

### 102 **Improved *R. clarus* genome assembly indicates high similarity in** 103 **rDNA genomic structure between *R. irregularis***

104 Here, we obtained an improved *R. clarus* genome assembly covering all of the 48S  
105 rDNA loci that were expected based on the read depth of coverage (**Fig. 1**). The improved *R.*  
106 *clarus* rDNA resembled that of *R. irregularis*: it exhibited 11 copies, a non-tandemly repeated  
107 structure, and heterogeneity among the copies (**Fig. 1b**).

108 The total size of the *R. clarus* contigs was comparable with the estimated genome size,  
109 and the gene models covered almost all of the eukaryotic conserved gene sets. A total of  
110 5,819,346 PacBio reads were generated, with an average length of 3.4 kb (**Supplementary**  
111 **Tables 1 and 2**). The assembling and the error correction resulted in a sequence dataset  
112 containing 147 Mbp (360 contigs, N50 = 1.30 Mbp, 31,233 genes) (**INSDC;**  
113 **BLAL01000001-BLAL01000360**). A BUSCO analysis revealed high coverage of the  
114 eukaryotic conserved gene set (95.1%, DB; eukaryota\_odb9, **Supplementary Table 2**). *R.*  
115 *clarus* contained a telomeric region on the edge of multiple contigs as *R. irregularis* (7 in *R.*  
116 *irregularis* and 63 in *R. clarus*). The nucleotide sequence of telomeres was “TTAGGG,”  
117 similar to that of the majority of fungi [20]. Although the nuclear phase remains unclear in  
118 AM fungi [21], our data informed us that the AM fungus has the usual telomeric region and  
119 suggested the minimum expected number of chromosomes.

120 Our *R. clarus* assembly shared the three exceptional rDNA features with *R. irregularis*.  
121 RNAmmer found 11 copies of the complete 45S rDNA cluster, which was composed of 18S  
122 rRNA, intergenic spacer region 1 (ITS1), 5.8S rRNA, ITS2, and 28S rDNAs (**Fig. 1a,**  
123 **Supplementary Data 1, Supplementary Figure 1**). None of the *R. clarus* rDNAs formed the

124 TRS, comprising multiple tandemly repeated units of the 45S rDNAs. Most of the 45S  
125 clusters were located on different contigs; a single copy of rDNA was detected in three  
126 contigs, and two copies were found in four contigs (Fig. 1a). In cases in which two rDNA  
127 clusters were found, the two copies resided apart from each other and did not form a tandem  
128 repeat. The internal regions contained protein-coding genes, respectively, and the two clusters  
129 were located on reverse strands from each other. Because all rDNA copies were located >10  
130 kb away from the edge of each contig (**Fig. 1a**), the absence of TRS was unlikely to be an  
131 artifact derived from an assembly problem. We found no synteny between the two  
132 *Rhizophagus* rDNAs.

133 To confirm that no rDNA clusters were overlooked, we estimated the rDNA CN based  
134 on the read depth of coverage. The mapping of the genomic Illumina reads onto the selected  
135 reference sequences indicated that the average coverage depth of the consensus rDNA was  
136 approximately nine times deeper than that of the genome, suggesting that *R. clarus* possesses  
137 around nine copies of rDNAs in its genome (**Fig. 1b, Supplementary Data 2**). Thus, we  
138 considered that our genome assembly (containing 11 rDNA copies) covered almost all of the  
139 rDNA copies.

140 The obtained rDNAs indicated polymorphism among the 45S rDNA clusters on *R.*  
141 *clarus*, similar to that of *R. irregularis*. Pairwise comparisons of the 11 rDNA copies detected  
142 an average of 40.9 indels and 76.8 sequence variants, whereas one of the sequence pairs  
143 (RCL\_c3122\_1 and RCL\_c3122\_2) had identical sequences (**Supplementary Data 3**).

144 To examine the phylogenetic distribution of the heterogeneous rDNAs, we constructed  
145 a phylogenetic tree with previously released *Rhizophagus* ITS sequences (**Fig 1d**). Before the  
146 phylogenetic analysis, we improved the erroneous region on the previous PacBio-based *R.*  
147 *irregularis* genome (GCA\_002897155.1) using Illumina reads. The previous genome, which  
148 was corrected on the GATK software [5], was improved via a standard correction software

149 for long-read-based assemblies, Pilon [22]. The new assemblies obtained differed from the  
150 previous genome at 3,660,534 positions (2.4% of the alignment, **INSDC; BDIQ02000001-**  
151 **BDIQ02000210**). However, the ten 48S rDNA clusters exhibited no differences compared  
152 with the previous genomes. We used these rDNA regions as reference sequences hereafter.  
153 Phylogenetic analysis revealed that the rDNA polymorphisms of our *R. clarus* genome  
154 covered most of the polymorphisms reported previously for this species. Moreover, an rDNA  
155 cluster, RCL\_c3086\_1, established a clade with the *Rhizophagus cactus* rDNA (**Fig 1d**).

## 156 **Distribution of non-tandemly repeated rDNAs across AM fungi**

157 We researched the extensive conservation of the *Rhizophagus*-type rDNA using  
158 previously released fungal genomes. We selected four AM fungi and 20 non-AM fungal  
159 species from the public database and obtained successive results from two AM fungi and five  
160 non-AM species (**Supplementary Data 2**). The read depth and direct search of rDNA regions  
161 showed the conservation of the copy number reduction (CNR) and the TRS-lacking features  
162 among AM fungi. In the non-AM fungi, we obtained no evidence of the presence of the  
163 *Rhizophagus*-type rDNA.

164 To estimate rDNA copy number variation (CNV), we compared the abundance of  
165 Illumina reads aligned to rDNA and genomic sequences [23]. Due to the difficulty of the  
166 rDNA region assembling, we presumed that the read depth gives a more reliable estimation of  
167 the rDNA CNV than does the homology-based search of the assemblies. The estimated  
168 number of 48S rDNA copies was 1 or 10 in AM species (*G. cerebriforme* and *D. epigaea*)  
169 and 71–496 in the non-AM fungi (**Fig. 2, Supplementary Data 2**). These results suggest that  
170 the CNR is not limited to the genus *Rhizophagus* but is seemingly common among AM  
171 species. In non-AM species, we found no CN under 20 (**Fig. 2**), which is lethal for yeast [24].  
172 Even if we included the six species that contained a single or partial rDNA gene (see Material



173 and Methods, **Supplementary Data 2, Supplementary Figure 2**) in the analysis, no species  
174 contained over 20 rDNA copies, with the exception of *Jimgerdemannia flammicorona*  
175 (*Endogonales*; estimated CN, 2), which is a plant-symbiotic species [25].

176 Our searching of the rDNA regions on the public assemblies supported the absence of  
177 the TRS in the two AM species (*G. cerebriforme* and *D. epigaea*). The *D. epigaea* genome  
178 (GCA\_003547095) had seven 48S rDNA clusters and two 28S rDNAs (**Fig. 2**). The depth-  
179 based CN, i.e., ten copies, suggested that the public genome contains the majority of the  
180 rDNA copies in *D. epigaea*. We cannot deny the possibility that the two 28S copies, which  
181 were located near the edge of contigs (1,760 bp and 522 bp), are part of the TRS structure.  
182 However, the depth-based CN suggests that even if the two 28S built the TRS on the inter-  
183 assembly region, these overlooked TRS would be short (under three copies). Another AM  
184 fungus, *G. cerebriforme* (GCA\_003550305), had two clusters of 45S rDNA on the different  
185 contigs. Although these clusters were located near the edge of the contigs (1–3, 178 bp), the  
186 depth-based CN (one copy) denied the presence of a long TRS structure on the genome (**Fig.**  
187 **2, Supplementary Data 2**).

188 In the five non-AM species, we obtained no evidence of the TRS-lacking feature. The  
189 public assemblies contained only part of the rDNA regions at 2–15 copies, and the rDNAs  
190 were located on the edge of assemblies (**Fig. 2, Supplementary Data 2**). Interestingly, two  
191 *Mucorales* species (*Phycomyces blakesleeanus* and *Mucor circinelloides*) contained one 45S  
192 rDNA located >10 kb away from the edge of the assembly (**Fig. 2**), respectively. Although  
193 the depth-based CN (*P. blakesleeanus*, 147–151 copies; *M. circinelloides*, 124–127 copies)  
194 indicated that the public genome data did not contain the majority of the rDNA regions, we  
195 found at least one TRS-lacking rDNA on this genome (**Fig. 2**). In an *Endogonaceae* species, *J.*  
196 *flammicorona*, the public genome had only one 28S rDNA. Although the read depth analysis

197 indicated the presence of a *Rhizophagus*-like CNR in this species, the public assemblies were  
198 not sufficient to assess the genomic structure.

199       Regarding the intragenomic heterogeneity of the rDNA, the public genomes contained  
200 too many ambiguous sites to allow a discussion of the heterogeneity. Hence, we skipped the  
201 analysis of the intragenomic heterogeneity in the non-*Rhizophagus* group.

## 202 **Distribution of intragenomic polymorphisms is highly similar** 203 **between the two *Rhizophagus* species**

204       We then focused on the conservation of the intragenomic polymorphic site among the  
205 AM species. A previous study of *R. irregularis* reported that the intragenomic polymorphic  
206 site is not distributed uniformly on the rDNAs and argued that the variation-enriched site may  
207 be upon the diversifying selection [5]. However, a report of a single species is insufficient to  
208 exclude the possibility of the accumulation of random mutations at that site. Hence, we  
209 compared the intragenomic polymorphic site between the two *Rhizophagus* species, and  
210 found a similarity of the polymorphic site distribution. The variation-enriched site  
211 corresponded with the yeast ES27L, which is one of the eukaryote-specific (ES) expansion  
212 segments related to translation fidelity and antibiotic sensitivity [26–28].

213       To quantify the intragenomic polymorphism, we calculated the intragenomic  
214 polymorphic sites for each 50-base window on the aligned rDNA copies. As references, we  
215 selected *C. merolae* and a malaria parasite species, *Plasmodium falciparum*, due to the  
216 similarity of their rDNA structure with that of AM fungi [29, 30]. The overview of the  
217 polymorphism distribution was highly similar between *R. irregularis* and *R. clarus*, although  
218 the remaining two species indicated several different patterns with them (**Fig. 3**). Many of the  
219 variations were located on the ITS regions in all samples. The AM species and *P. falciparum*  
220 had an additional peak on the forward region of 28S. The two AM fungi shared another peak

221 in the middle of the 28S rDNA. We then identified the corresponding region with the six  
222 domains on the *S. cerevisiae* 28S rDNA [31] via alignment, and revealed that the variation-  
223 enriched region in the AM fungi corresponded with domains I, III, IV, and VI. Intriguingly,  
224 the ES27L site of domain IV exhibited an especially high variation in both species (**Fig. 3**).

225 To assess the effect of the polymorphism on the rRNA secondary structure, we  
226 performed an *in silico* structure prediction. Before the prediction, we clustered the rDNA  
227 copies that had identical “domain IV” sequences and obtained five *R. irregularis* clusters and  
228 four *R. clarus* clusters (**Fig. 4a**). Our *in silico* analysis predicted that the AM fungi have three  
229 types of the “ES27L” structure; i.e., a *S. cerevisiae*-like structure (named yeast type), a “c”  
230 arm-lacking structure (straight type), and a structure with an additional branch on the “b” arm  
231 (beak type) (Fig. 4B). Although the beak type was only found in *R. clarus* (c3086-1), the  
232 yeast type and straight type were detected in the rDNA of both species. The yeast type was  
233 abundant in *R. irregularis* (eight in *R. irregularis* and two in *R. clarus*), and the straight type  
234 was more frequent in *R. clarus* (eight in *R. clarus* and two in *R. irregularis*). The  
235 phylogenetic analysis of the whole 28S rDNA sequences revealed that the copies that had the  
236 same structural type did not establish a monophyletic clade (**Fig. 4b**).

## 237 **Host-specific rDNA expression in *R. irregularis***

238 To examine whether the rDNA expression profiles were affected by host conditions or the host  
239 species, we performed a PacBio CCS, which generates accurate long-read sequences through multiple  
240 repetitions of the sequencing of the same DNA molecules [19]. This method has been adopted in  
241 several ecological studies targeting rDNA in AM species [32, 33]. Our rRNA-targeting CCS showed  
242 that the rDNA expression profiles largely depended on the host plant species.

243 We constructed 23 CCS libraries from *R. irregularis*-colonizing plant organs (**Supplementary**  
244 **Data 4**) (**INSDC; PRJDB9672**). As a host plant, we used the model legume *Lotus japonicus* MG20  
245 [34, 35] (17 libraries) and the basal land plant *Marchantia paleacea* [36] (6 libraries). We cultivated

246 the legume-infecting samples under five conditions (**Supplementary Data 4**) to analyze the  
247 expression profiles after cuttings off the host shoots. The shoots cutting promotes the sporulation of  
248 AM fungi [37]. We obtained 61,290 AM fungal reads from the libraries and clustered the CCS reads to  
249 calculated the relative amount of each rRNA type. After several rounds of optimization of the CD-Hit-  
250 est-2D [38] parameters, we obtained the best clustering of the sequences with -c 99.

251 The identified profiles showed a conserved rRNA expression ratio in *L. japonicus* mycorrhizal  
252 roots with or without the shoot-cutting step in the host plants. Conversely, we detected significant  
253 differences in their expression profiles between *L. japonicus* roots and *M. paleacea* thalli (**Fig. 5**). The  
254 trend of the profiles was similar in types [c62\_1, c62\_2], [c312\_1], [c356\_1], and [c4\_1]. However, it  
255 was different in the remaining three types ([c35\_1], [c39\_1], and [c52\_1, c311\_1]), which exhibited  
256 different rankings in the degree of expression according to the cultivation condition (**Fig. 5A**). The  
257 PCA analysis of the rRNA profiles revealed that samples of colonized *L. japonicus* roots were  
258 indistinguishable under the various conditions and that the clear distinction of profiles depended on  
259 the host species (**Fig. 5b**). The multivariate analysis of variance (MANOVA) identified statistically  
260 significant differences in the profiles ( $P < 0.001$ ) (**Fig. 5b**).

261

## 262 Discussion

263 Here, we revealed that the three rDNA features of *R. irregularis* were conserved in *R.*  
264 *clarus* [5, 14], i.e., (1) decreased copy count of the 48S rDNA, (2) absence of the TRS, and  
265 (3) intragenomic heterogeneity. Moreover, our analysis of the public genome data supported  
266 the wide distribution of the disarranged rDNA (a handful of TRS-lacking rDNAs) in non-  
267 *Rhizophagus* AM fungi. The cross-species comparison found conservation of the variation-  
268 enriched sites, ES27L, between *R. irregularis* and *R. clarus*. The rRNA-targeting clustering  
269 showed that the rRNA expression profiles were affected by the host plant species.

270 Based on the improved/reanalyzed genome data, we found that three AM species  
271 commonly had an exceptionally low 48S rDNA CN (*R. clarus*, 11 copies; *G. cerebriforme*, 2  
272 copies; and *D. epigaea*, 7–10 copies). The previously reported CN in *R. irregularis* (ten  
273 copies) was the lowest among eukaryotes other than pneumonia-causing *Pneumocystis* (one  
274 copy) [39], *C. merolae* (three copies) [29], and malaria-causing *Plasmodium* (five to eight  
275 copies) [5, 30]. The CNV of the rDNA ranged from 14 to 1,442 in other fungi [23]. The  
276 rDNA CN is relevant for translation efficiency, because multiple rDNAs are required to  
277 synthesize a sufficient amount of rRNA [24, 40]. Although an rDNA CN <20 is lethal in *S.*  
278 *cerevisiae* [24], the successive cultivation of AM fungi with their reduced rDNA counts  
279 suggested that the handful of rDNA copies is sufficient to support the growth of AM fungi.  
280 Our team previously hypothesized that the AM fungus has a unique ribosome synthesis step  
281 to recover from the low rDNA CN, based on the results obtained for a single AM species, *R.*  
282 *irregularis* [5]. The conservation of the rDNA CNR identified here supports the  
283 generalization of our previous hypothesis to the genus *Rhizophagus* and the AM fungus.

284 Our depth-based CNV analysis of non-AM fungi suggested that a sister group of the  
285 AM fungus, *Mucorales*, retained the ordinary number of rDNA copies (71–151) (**Fig. 2,**  
286 **Supplementary Data 2**). The simple mapping to the phylogenetic tree indicated that the

287 CNR occurred on the common ancestor of the AM fungus, although rDNA data for  
288 *Endogonales* (a plant-symbiotic group closely related to *Mucorales*) [25] have not been  
289 collected (**Supplementary Figure 2**). It is interesting that a previous study identified CNR on  
290 distantly related plant-symbiotic fungi (e.g., *Oidiodendron maius*, 11 copies; *Phialocephala*  
291 *scopiformis*, 15 copies; *Cenococcum geophilum*, 15 copies; and *Meliniomyces variabilis*, 18  
292 copies) [23]. Although the genomic structure and intragenomic heterogeneity of these species  
293 remain unknown, the rDNA CNR may be a universal trend related to plant root symbiosis.

294 We also found evidence of the conservation of the absence of the TRS in AM fungi.  
295 The TRS-lacking feature has been observed only in the *R. irregularis*, malaria parasites, and  
296 *C. merolae* genomes, which exhibit 48S rDNA CNR (malaria parasites, five to eight copies;  
297 *C. merolae*, three copies). This correspondence between the TRS-lacking and CNR features is  
298 reasonable because the TRS is part of the recovery system of the rDNA CN, i.e., unequal  
299 sister chromatid recombination (USCR) [41]. The TRS increases the rDNA CN via  
300 recombination with a neighbor repeat during the DNA duplication stages [42]. An unknown  
301 highly efficient rRNA synthesis activity in the AM fungus might reduce the selective pressure  
302 against the retention of the rDNA CN and might disrupt the TRS in AM fungi. We found both  
303 TRS-lacking and TRS-keeping 48S rDNAs in the two *Mucorales* species (**Fig. 2**). Although  
304 the genomic structure of the remaining rDNA copies in these species is unclear, the TRS-  
305 lacking rDNA might have arisen from a normal TRS-containing rDNA in the common  
306 ancestor of the AM fungus and *Mucorales*; subsequently, the ancestral AM fungus might  
307 have lost the TRS-containing rDNAs.

308 The heterogeneity of the intragenomic sequence in rDNA is attractive in terms of  
309 ribosome heterogeneity. The evolutionary model of the rDNA has assumed that the TRS-  
310 dependent CN recovery causes the homogeneity of the rDNA through the bottleneck effect  
311 (concerted evolution) [24]. Several organisms, including the TRS-lacking malaria parasites,

312 exhibit rDNA/rRNA heterogeneity with tissue- and cell stage-specific expression patterns  
313 [43–45]. However, the functional consequences of this rRNA variation have not been  
314 established [2], and It was also unclear whether the rDNA heterogeneity is related with an  
315 adaptation or an evolutionarily neutral diversification. We revealed the conservation of  
316 polymorphism-enriched region of ITS, domains I, III, IV, and VI, between the two  
317 *Rhizophagus* (**Fig. 3**). For the ITS region, a similar variation accumulation was determined  
318 from other TRS-lacking species (*C. merolae* and *P. falciparum*). This accumulation may be  
319 attributed to their weak evolutionary constraints compared with rRNA-encoding regions.  
320 Conversely, the variation peak on the ES27L site of domain IV was only found on the two  
321 AM fungi; the polymorphism of *C. merolae* was very weak on the rRNA-encoded region, and  
322 *P. falciparum* exhibited a scattered distribution of the variation site for all RNA-encoded  
323 regions (**Fig. 3**). The data concerning *C. merolae* indicate that the polymorphism on ES27L is  
324 not inevitable in TRS-lacking eukaryotes. These results suggest that the polymorphisms did  
325 not occur randomly on the AM rDNAs, but they reflected some functional redundancy or  
326 disruptive selection on the region. Specific alleles on this site may be maintained for  
327 unknown evolutionary reasons.

328 Our *in silico* secondary structure analysis indicated that intragenomic variations were  
329 scattered over the “b” stem loops of *Rhizophagus* ES27L (**Fig. 4**). Moreover, the two AM  
330 fungi commonly had an rDNA genotype lacking the “c” arm (straight type). In multiple  
331 species, the ES27L has been modeled in cryo-EM, to point toward the peptide exit tunnel of  
332 the ribosome [46, 47]. A previous experimental deletion indicated that the “b” arm has a  
333 function in translation fidelity via binding to methionine aminopeptidase (MAP1) in *S.*  
334 *cerevisiae*; the deletions in the “b” arm induce amino acid misincorporation and stop codon  
335 read through upon treatment with translational-error-inducing antibiotics (paromomycin) [27],  
336 and the whole deletion of “b” changes the proteomic profiles [28]. The polymorphism

337 observed on the AM fungal “b” arm may contribute to translation fidelity control and  
338 modulates the sensitivity against antibiotics. The heterogeneity observed in ES27L was not  
339 accompanied by the diversification of the binding protein on the platform; two *Rhizophagus*  
340 genomes contained the single ortholog of yeast Map1, respectively (Supplementary Data 6). It  
341 should be noted that the deletions in the “b” arm increased the resistance against anisomycin  
342 and cycloheximide in yeast [27], indicating that the complete “b” arm reduces the resistance  
343 against these antibiotics. This trade-off might result in the selection of the diversification of  
344 the AM fungal rDNA. It should be noted that plants have an antibiotic-like substrate that is  
345 used for self-defense [48]. For example, ricin from *Ricinus communis* cleaves the *N*-  
346 glycosidic bond in 28S rRNA [49]. The intragenomic diversity of rDNA may enable  
347 symbionts to pass through the species-specific diversified defense mechanisms of plants and  
348 contribute to the establishment of symbiosis with a broad range of plant species.

349       Regarding the “c” arm, the deleted yeast did not display any changes in the sensitivity  
350 or tolerance to any of the inhibitors tested (cycloheximide, anisomycin, and hygromycin B)  
351 [27]. However, the conservation of the “c” arm among eukaryotes suggests their importance  
352 for life. The deletion of the whole ES27L is lethal in yeast and *Tetrahymena* [26, 50].  
353 Meanwhile, in *Drosophila* ribosomes, the interaction between the “c arm” and the S8e  
354 ribosomal protein forms an intersubunit bridge and was considered to contribute to the  
355 conformation dynamics of the binding with the elongation factor 2 (eEF2) [51]. Nonetheless,  
356 future studies of the effect against various antibiotics are needed to reveal the function of  
357 ES27L in AM species.

358       The heterogeneity of the rDNA is also an important subject in terms of biodiversity.  
359 Our *R. clarus* genome assembly indicated that intragenomic variation covered most of the  
360 polymorphisms previously reported in this species (**Fig. 1d**). This result provides an incentive  
361 to review the rDNA diversity of other AM fungi. The ITS and a part of the 28S rDNA have



362 been widely used as a marker gene for the ecological and taxonomic studies of AM fungi [52].  
363 The intraindividual rDNA diversity of AM fungi has been indicated because multiple rDNA  
364 genotypes were reported from the single fungal body in many AM species [53–57]. Single-  
365 nucleus sequencing indicated that this multinucleate fungus has genetically different nuclei in  
366 its body (heterokaryosis) [14, 15, 58]. Our previous finding of intragenomic heterogeneity in  
367 *R. irregularis* led to a discussion of the contribution of the combination of heterokaryosis and  
368 intragenomic heterogeneity to intraindividual heterogeneity within a fungal body [5]. The  
369 present results from *R. clarus* reinforce the hypothesis that the multilayered diversification  
370 mechanism causes intraindividual rDNA heterogeneity in *Rhizophagus*. The intragenomic  
371 variation in *R. irregularis* was not sufficient to disrupt species-level identification [5].  
372 However, our result that an *R. clarus* rDNA copy established a clade with the sequence of *R.*  
373 *cactus* (**Fig. 1d**) indicated that imbalanced amplification and sequencing among the paralogs  
374 have the potential to cause erroneous identification of species.

375 The rRNA profile of *R. irregularis* identified here was similar under the same  
376 incubation condition but was modified by drastic changes in the condition. A previous RNA-  
377 seq study indicated that all of the rDNA genotypes retained the translation activity in a pre-  
378 infected stage of *R. irregularis* [5]. The rRNA profiles were significantly affected by the  
379 variation of the incubation period (22–36 dpi and 3 months) and the type of host plant  
380 (legumes to liverworts). Moreover, the ratio of each rRNA type was not correlated with the  
381 CN of each rDNA gene (**Fig. 5**). Due to the slow growth rate of liverwort-infected AM fungi,  
382 we cannot align the incubation period with that of the legume-infected sample. However, the  
383 observed dynamics suggest that the AM fungus changed the 28S rDNA expression of each  
384 copy via a yet unknown environment-specific expression control system. Other species  
385 containing heterogeneous rDNA/rRNA (malaria parasites, zebrafish, mice, and humans) [43,  
386 44, 51, 59] also exhibit similar condition-dependent expression changes. Although these

387 organisms have complete replacements of the rRNA type at some developmental stages [59],  
388 we found no replacement of the rRNA types under the adopted conditions. We used the whole  
389 body of the incubated AM fungi together with host plant roots. Additional structure-specific  
390 rRNA sampling would provide insights into the dynamics and their adaptive contribution to  
391 AM fungi. The principal component score and the actual change in the reading count ratio  
392 indicated that the change of [c52\_1, c311\_1]-type expression ratio relates to the host-  
393 dependent modification. Interestingly, the [c52\_1, c311\_1] type lacks the “c” arm on the  
394 ES27L, and some SNP on “b” arms were determined based on a comparison with the  
395 remaining types (**Fig. 4**). This result tempted us to speculate that this [c52\_1, c311\_1]-derived  
396 rRNA affords a suitable ribosome for the symbiosis with liverworts.

397       Here, we indicated the possibility of relationships between plant symbiosis and  
398 disarranged heterogeneous rDNA. Although multiple genomes of mutualistic eukaryote have  
399 been identified [60]. Extended genomes: symbiosis and evolution), the previous studies  
400 ignored the analysis of rDNA due to the difficulty in assembling their genome. The  
401 assumption that all the eukaryotes have homogeneous TRS-making rDNAs may have drawn  
402 attention away from rDNA diversity. The recent “renaissance” of ribosome heterogeneity [2]  
403 may renew the study not only of embryology/physiology but also of symbiotic biology.

404

## 405 **Material and Methods**

### 406 **PacBio-based genome assembling**

407           The genome sequencing and gene annotation of *R. clarus* HR1 (MAFF:520076)  
408 was performed according to a previous study [5], with some modification (Supplementary  
409 Data 9). We isolated a complete mitochondrial sequence from the contigs and then submitted  
410 the assemblies to the DDBJ (nuclear DNA = BLAL01, mitochondrial DNA = LC506577).  
411 For the prompt submission of the genomic gene model data to DDBJ, we used GFF2MSS ver.  
412 3.0.2 script (<https://github.com/maedat/GFF2MSS>).

### 413 **Detection of ribosomal DNA and intragenomic polymorphisms**

414           Ribosomal DNA regions were detected by RNAmmer ver. 1.284 [61]. In *R. clarus*,  
415 the RNAmmer-based regions were refined manually based on the MAFFT v7.429-based [62]  
416 alignment to the 48S rRNA of *S. cerevisiae* S288C. The genomic positions of rDNAs were  
417 visualized using our script, GeneHere version 0.1.1 (<https://github.com/maedat/GeneHere>).  
418 The species analyzed and genomic data are summarized in **Supplementary Data 2**. We  
419 adopted the rDNA searches against 26 species and obtained multiple 18S and 28S sequences  
420 from 12 species. We excluded the remaining samples containing only a part of the 48S rDNA  
421 sequence from the downstream analysis.

422           The number of rDNA paralogs was estimated based on the mean depth of coverage.  
423 From public short-read data, we found suitable data for nine species (**Supplementary Data**  
424 **2**). The obtained read data were mapped to the references (whole-genomic data, extracted 18S,  
425 or 28S rDNA sequences) using bowtie2 version 2.3.5.1. The coverage depth of the references  
426 was calculated using bedtools version v2.29.0 (bedtools genomecov command with -d option),

427 and the statistics of each region were calculated and visualized using the R software ver. 3.6.1  
428 with the ggplot2 ver. 3.2.1 package.

429 The difference among the rDNA paralogs was calculated using our script, AliVa  
430 (<https://github.com/maedat/AliVa>), and the sequences were aligned by MAFFT ver. 7.427  
431 (options: --auto). The neighbor-net tree presented in **Fig. 1b** was generated by SplitsTree4 ver.  
432 4.14.8 (raw sequence data: 10.6084/m9.figshare.11880780) [63]. The phylogenetic trees  
433 depicted in Fig. 1c were constructed based on the MAFFT alignment  
434 (10.6084/m9.figshare.11880834) using the ML method with IQ-TREE ver.1.6.11 (options: -nt  
435 AUTO) [64]; they were also tested for robustness by bootstrapping (1000 pseudoreplicates).

## 436 **Analysis of the secondary structure of rDNA**

437 The secondary structure of the *Rhizophagus* 28S rDNAs was predicted in silico.  
438 Domains I–VI were determined through the manual alignment with the *S. cerevisiae* 28S  
439 rDNA. We then cut out each domain from the *Rhizophagus* rDNAs and predicted the  
440 secondary structure of each domain. We used RNAstructure ver. 6.1 for structure prediction  
441 and StructureEditor ver 6.1 for visualization [65]. After the prediction of the top five  
442 minimum free energy structures, we chose the structure that exhibited the greatest similarity  
443 to that of *S. cerevisiae*.

## 444 **Expression dynamics of rRNA**

445 The expression levels of the rDNA paralogs were examined with PacBio sequel in  
446 total RNA extracted from plant-infected *R. irregularis* DAOM-181602. Thalli of *Marchantia*  
447 *paleacea* subsp. *diptera* were grown with *R. irregularis* DAOM-181602 (Premier Tech) in  
448 growth conditions, as described previously [36].

449 Total RNAs were isolated using the modified CTAB method, as described  
450 previously by Nakagawa et al. (2011) [66], with some modifications (Supplementary Data 9).  
451 *Lotus japonicus* MG-20 seeds were surface sterilized and germinated on an agar plate  
452 containing no nutrients. Plants were grown in an artificially lit growth cabinet at 24°C for 16  
453 h (light) and 22°C for 8 h (dark). After 6 days, the seedlings were transferred to soil, as  
454 described previously by Miyata et al. (2014), with or without spores of *R. irregularis*. After  
455 22 days, some of these plants were cut, their aerial parts were removed, and plants were  
456 harvested at 2, 6, or 14 days after shoot removal.

457 The library used for PacBio CCS was prepared according to the protocol “Full-  
458 Length 16S Amplification, SMRTbell Library Preparation and Sequencing” (Pacific  
459 Biosciences, Part Number 101-599-700 version 01), with some modifications (Supplementary  
460 Data 9). The CCS sequences were generated on a PacBio Sequel sequencer using a Sequel  
461 Binding and Internal Control Kit 3.0 Mag Bead Binding Buffer Kit v2, and Sequel  
462 Sequencing Kit 3.0 (Pacific Biosciences). The raw reads obtained were assembled using  
463 SMRTLINK7 (Pacific Biosciences).

464

## 465 **Author contributions**

466           TM and MK conceived of and designed the experiments; TM, YK, TE, KY, TB, YN, SS, and MK  
467 performed the *R. clarus* genomic experiments and analyses; TM, TN, KY, SS, and MK performed the *R.*  
468 *irregularis* transcriptomic experiments and analyses. TM, TN, TE, SS, MK wrote the paper.

469

470

## 471 **Acknowledgment**

472 This work was supported by JST ACCEL Grant Number JPMJAC1403 and MEXT/JSPS KAKENHI Grant  
473 Number 19K22269, Japan. We thank Miwako Matsumoto, the Functional Genomics Facility and the Data  
474 Integration and Analysis Facility at the National Institute for Basic Biology for technical support;  
475 Katsuharu Saito, Kohki Akiyama. Computations were partially performed on the NIG supercomputer at  
476 ROIS National Institute of Genetics.

477

### 478 **Competing Interests:**

479 The authors declare no competing financial interests.

480

481

## 482 **Figure Legends**

483 **Fig. 1** Ribosomal DNAs of *R. clarus* and *R. irregularis*. **a** Genomic positions of the 48S  
484 rDNA clusters on the constructed contigs. Rir, *Rhizophagus irregularis* (cyan); Rcl,  
485 *Rhizophagus clarus* (magenta). Red and purple bar (with asterisk) indicate 48S rDNA, and  
486 telomeric region, respectively. Contigs with no 48S rDNA were omitted from the figure. **b**  
487 Read depth of coverage of the *R. clarus* rDNA regions and whole-genomic region. Red dots  
488 indicate mode value. **c** Neighbor-net tree based on the whole sequence of 48S rDNA  
489 sequences. **d** Maximum likelihood (ML) tree based on the ITS region of the rDNAs (420  
490 positions) (raw data, <https://doi.org/10.6084/m9.figshare.11880834>,  
491 [10.6084/m9.figshare.12251768](https://doi.org/10.6084/m9.figshare.12251768), [10.6084/m9.figshare.11880780](https://doi.org/10.6084/m9.figshare.11880780))

492

493 **Fig. 2** Predicted rDNA copy number and the distribution on the constructed genome data of  
494 the 18S and 28S rDNA. The colors are as in the left top box. The tree on the left was  
495 generated by the ML analysis of 96 single-copy genes. The bold line indicates the node  
496 supported with 100 bootstrap value. The species analyzed are presented using the  
497 abbreviations (Rir, *R. irregularis*; Rcl, *R. clarus*; Gce, *G. cerebriforme*; Dep, *D. epigaea*; Sra,  
498 *Syncephalastrum racemosum*; Hve, *Hesseltinella vesiculosa*; Mci, *Mucor circinelloides*; Pbl,  
499 *P. blakesleeanus*; Pfi, *Piromyces finnis*). The central bar plot shows the predicted copy  
500 number of rDNA based on the read mapping back (bar) and actually observed number in the  
501 public genome (black dot and triangle). The right plot shows the positions of the determined  
502 rDNA on each public genome sequence. Red bar indicates 48S, 18S, or 28S rDNA-encoding  
503 region. The sub-boxes indicate the expanded view of a part of the plot. Raw values of the  
504 analysis are presented in Supplementary Data 2.

505

506 **Fig. 3** Distribution of rDNA sequence variants within the 48S rDNA. Numbers of 48S rDNA  
507 in each species were described next to the right of the species name. The boxes above the x-  
508 axis indicate the 18S-5.8S-28S ribosomal RNA-encoding region. The secondary structure of  
509 the *S. cerevisiae* 28S rRNA was placed on the top right. The structure corresponding to  
510 ES27L was highlighted in red and magnified in the sub-box.

511

512 **Fig. 4** Polymorphisms on the ES27L region of the 28S rDNA/RNA. **a** Alignment of ES27L  
513 regions. The intragenomic conserved positions within each species were masked with gray  
514 color. **b** Secondary structures obtained from the *in silico* prediction of domain IV. Magenta, *R.*  
515 *clarus*; cyan, *R. irregularis*. The bottom ML tree was prepared from the whole 28S rDNA  
516 sequence. The abbreviations are defined in Supplementary Data 2.

517

518 **Fig. 5** Expression profiles of the rDNA in *R. irregularis* colonizing different host species and  
519 at different growth conditions. **a** Read count ratio in each AM fungal CCS library. Each point  
520 indicates the value from a sample (error bar = standard deviation). The bar represents the  
521 average of the values. The colors and point shapes indicate the type of rDNA. Legends are  
522 provided in the right-bottom box. The x-axis represents the condition of the colonized root  
523 samples of *L. japonicus* MG20 (CL-S). CL, shoot cutting at 22 days postinoculation (dpi) and  
524 sampling at 36 dpi; CM, shoot cutting at 22 dpi and sampling at 28 dpi; CS, shoot cutting at  
525 22 dpi and sampling at 24 dpi; L, cultivated for 36 dpi; S, cultivated for 24 dpi; MP,  
526 inoculated in *M. paleacea* and cultivated for three months. **b** Biplot of the principal  
527 component analysis (PCA) and their principal component score (red arrow). Each point  
528 represent a sample. The shape and color of the points indicate the difference of host species  
529 and growth conditions (see the top left box). Sample names were described to near the points.



530

## 531 **References**

- 532 1. Crick FH. On protein synthesis. *Symp Soc Exp Biol* 1958; **12**: 138–163.
- 533 2. Genuth NR, Barna M. The discovery of ribosome heterogeneity and its implications for gene  
534 regulation and organismal life. *Mol Cell* 2018; **71**: 364–374.
- 535 3. Dinman JD. Pathways to specialized ribosomes: the brussels lecture. *J Mol Biol* 2016; **428**:  
536 2186–2194.
- 537 4. Xue SF, Barna M. Specialized ribosomes: a new frontier in gene regulation and organismal  
538 biology. *Nat Rev Mol Cell Biol* 2012; **13**: 355–369.
- 539 5. Maeda T, Kobayashi Y, Kameoka H, Okuma N, Takeda N, Yamaguchi K, et al. Evidence of non-  
540 tandemly repeated rDNAs and their intragenomic heterogeneity in *Rhizophagus irregularis*.  
541 *Commun Biol* 2018; **1**: 87.
- 542 6. Spatafora JW, Chang Y, Benny GL, Lazarus K, Smith ME, Berbee ML, et al. A phylum-level  
543 phylogenetic classification of zygomycete fungi based on genome-scale data. *Mycologia* 2016;  
544 **108**: 1028–1046.
- 545 7. Bonfante P, Genre A. Mechanisms underlying beneficial plant–fungus interactions in  
546 mycorrhizal symbiosis. *Nat Commun* 2010; **1**: 48.
- 547 8. Corradi N, Bonfante P. The arbuscular mycorrhizal symbiosis: origin and evolution of a  
548 beneficial plant infection. *PLoS Pathog* 2012; **8**.
- 549 9. Öpik M, Davison J. Uniting species- and community-oriented approaches to understand  
550 arbuscular mycorrhizal fungal diversity. *Fungal Ecology* . 2016. , **24**: 106–113
- 551 10. van der Heijden MGA, Klironomos JN, Ursic M, Moutoglis P, Streitwolf-Engel R, Boller T, et  
552 al. Mycorrhizal fungal diversity determines plant biodiversity, ecosystem variability and  
553 productivity. *Nature* 1998; **396**: 69–72.
- 554 11. Van Der Heijden MGA, Martin FM, Selosse M-A, Sanders IR. Mycorrhizal ecology and  
555 evolution: the past, the present, and the future. *New Phytol* 2015; **205**: 1406–1423.

- 556 12. Davison J, Moora M, Ouml;pik M, Adholeya A, Ainsaar L, Ba A, et al. Global assessment of  
557 arbuscular mycorrhizal fungus diversity reveals very low endemism. *Science* 2015; **349**: 970–  
558 973.
- 559 13. Gianinazzi-Pearson V. Plant cell responses to arbuscular mycorrhizal fungi: getting to the roots  
560 of the symbiosis. *Plant Cell* 1996; **8**: 1871–1883.
- 561 14. Lin K, Limpens E, Zhang Z, Ivanov S, Saunders DGO, Mu D, et al. Single nucleus genome  
562 sequencing reveals high similarity among nuclei of an endomycorrhizal fungus. *PLoS Genet*  
563 2014; **10**: e1004078.
- 564 15. Montoliu-Nerin M, Sánchez-García M, Bergin C, Grabherr M, Ellis B, Kutschera VE, et al.  
565 Building *de novo* reference genome assemblies of complex eukaryotic microorganisms from  
566 single nuclei. *Sci Rep* 2020; **10**: 1303.
- 567 16. Morin E, Miyauchi S, San Clemente H, Chen ECH, Pelin A, de la Providencia I, et al.  
568 Comparative genomics of *Rhizophagus irregularis*, *R. cerebriforme*, *R. diaphanus* and  
569 *Gigaspora rosea* highlights specific genetic features in Glomeromycotina. *New Phytol* 2019;  
570 **222**: 1584–1598.
- 571 17. Venice F, Ghignone S, Salvioli di Fossalunga A, Amselem J, Novero M, Xianan X, et al. At the  
572 nexus of three kingdoms: the genome of the mycorrhizal fungus *Gigaspora margarita* provides  
573 insights into plant, endobacterial and fungal interactions. *Environ Microbiol* 2020; **22**: 122–141.
- 574 18. Kobayashi Y, Maeda T, Yamaguchi K, Kameoka H, Tanaka S, Ezawa T, et al. The genome of  
575 *Rhizophagus clarus* HR1 reveals a common genetic basis for auxotrophy among arbuscular  
576 mycorrhizal fungi. *BMC Genomics* 2018; **19**: 465.
- 577 19. Wenger AM, Peluso P, Rowell WJ, Chang P-C, Hall RJ, Concepcion GT, et al. Accurate circular  
578 consensus long-read sequencing improves variant detection and assembly of a human genome.  
579 *Nat Biotechnol* 2019; **37**: 1155–1162.
- 580 20. Cohn M, Liti G, Barton DBH. Telomeres in fungi. *Comparative Genomics*. 2005. Topics in  
581 current genetics, pp 101–130.
- 582 21. Kamel L, Keller-Pearson M, Roux C, Ané J-M. Biology and evolution of arbuscular mycorrhizal  
583 symbiosis in the light of genomics. *New Phytol* 2017; **213**: 531–536.

- 584 22. Walker BJ, Abeel T, Shea T, Priest M, Abouelliel A, Sakthikumar S, et al. Pilon: an integrated  
585 tool for comprehensive microbial variant detection and genome assembly improvement. *PLoS*  
586 *One* 2014; **9**: e112963.
- 587 23. Lofgren LA, Uehling JK, Branco S, Bruns TD, Martin F, Kennedy PG. Genome-based estimates  
588 of fungal rDNA copy number variation across phylogenetic scales and ecological lifestyles. *Mol*  
589 *Ecol* 2019; **28**: 721–730.
- 590 24. Ganley ARD, Kobayashi T. Highly efficient concerted evolution in the ribosomal DNA repeats:  
591 Total rDNA repeat variation revealed by whole-genome shotgun sequence data. *Genome Res*  
592 2007; **17**: 184–191.
- 593 25. Chang Y, Desirò A, Na H, Sandor L, Lipzen A, Clum A, et al. Phylogenomics of Endogonaceae  
594 and evolution of mycorrhizas within Mucoromycota. *New Phytol* 2019; **222**: 511–525.
- 595 26. Ramesh M, Woolford JL Jr. Eukaryote-specific rRNA expansion segments function in ribosome  
596 biogenesis. *RNA* 2016; **22**: 1153–1162.
- 597 27. Fujii K, Susanto TT, Saurabh S, Barna M. Decoding the function of expansion segments in  
598 ribosomes. *Mol Cell* 2018; **72**: 1013–1020.e6.
- 599 28. Shankar V, Rauscher R, Reuther J, Gharib WH, Koch M, Polacek N. rRNA expansion segment  
600 27Lb modulates the factor recruitment capacity of the yeast ribosome and shapes the proteome.  
601 *Nucleic Acids Res* 2020.
- 602 29. Matsuzaki M, Misumi O, Shin-I T, Maruyama S, Takahara M, Miyagishima S-Y, et al. Genome  
603 sequence of the ultrasmall unicellular red alga *Cyanidioschyzon merolae* 10D. *Nature* 2004; **428**:  
604 653–657.
- 605 30. Gardner MJ, Hall N, Fung E, White O, Berriman M, Hyman RW, et al. Genome sequence of the  
606 human malaria parasite *Plasmodium falciparum*. *Nature* 2002; **419**: 498–511.
- 607 31. Petrov AS, Bernier CR, Gulen B, Waterbury CC, Hershkovits E, Hsiao C, et al. Secondary  
608 structures of rRNAs from all three domains of life. *PLoS One* 2014; **9**: e88222.
- 609 32. Schlaeppi K, Bender SF, Mascher F, Russo G, Patrignani A, Camenzind T, et al. High-resolution  
610 community profiling of arbuscular mycorrhizal fungi. *New Phytol* 2016; **212**: 780–791.
- 611 33. Tedersoo L, Tooming-Klunderud A, Anslan S. PacBio metabarcoding of fungi and other

- 612 eukaryotes: errors, biases and perspectives. *New Phytol* 2018; **217**: 1370–1385.
- 613 34. Kawaguchi M. *Lotus japonicus* 'miyakojima' mg-20: an early-flowering accession suitable for  
614 indoor handling. *J Plant Res* 2000; **113**: 507–509.
- 615 35. Kato T, Kaneko T, Sato S, Nakamura Y, Tabata S. Complete structure of the chloroplast genome  
616 of a legume, *Lotus japonicus*. *DNA Res* 2000; **7**: 323–330.
- 617 36. Kobae Y, Ohtomo R, Morimoto S, Sato D, Nakagawa T, Oka N, et al. Isolation of native  
618 arbuscular mycorrhizal fungi within young thalli of the liverwort *Marchantia paleacea*. *Plants*  
619 2019; **8**.
- 620 37. Redhead JF. Endotrophic mycorrhizas in Nigeria: some aspects of the ecology of the endotrophic  
621 mycorrhizal association of *Khaya grandifoliola* C. DC. *Endomycorrhizas; Proceedings of a*  
622 *Symposium* 1975.
- 623 38. Fu L, Niu B, Zhu Z, Wu S, Li W. CD-HIT: accelerated for clustering the next-generation  
624 sequencing data. *Bioinformatics* 2012; **28**: 3150–3152.
- 625 39. Cushion MT, Keely SP. Assembly and annotation of *Pneumocystis jirovecii* from the human lung  
626 microbiome. *MBio* 2013; **4**.
- 627 40. Milo R, Phillips R, Goodsell DS, Lane N, Nelson P, Hoffmann PM, et al. Cell biology by the  
628 numbers. *Taylor & Francis Inc.* [https://www.bookdepository.com/Cell-Biology-by-Numbers-](https://www.bookdepository.com/Cell-Biology-by-Numbers-Ron-Milo/9780815345374)  
629 [Ron-Milo/9780815345374](https://www.bookdepository.com/Cell-Biology-by-Numbers-Ron-Milo/9780815345374). Accessed 5 Mar 2018.
- 630 41. Ganley ARD, Ide S, Saka K, Kobayashi T. The effect of replication initiation on gene  
631 amplification in the rDNA and its relationship to aging. *Mol Cell* 2009; **35**: 683–693.
- 632 42. Kobayashi T. Ribosomal RNA gene repeats, their stability and cellular senescence. *Proceedings*  
633 *of the Japan Academy Series B-Physical and Biological Sciences* 2014; **90**: 119–129.
- 634 43. Gunderson JH, Sogin ML, Wollett G, Hollingdale M, de la Cruz VF, Waters AP, et al.  
635 Structurally distinct, stage-specific ribosomes occur in *Plasmodium*. *Science* 1987; **238**: 933–937.
- 636 44. Li J, Wirtz RA, McConkey GA, Sattabongkot J, McCutchan TF. Transition of *Plasmodium vivax*  
637 ribosome types corresponds to sporozoite differentiation in the mosquito. *Mol Biochem Parasitol*  
638 1994; **65**: 283–289.
- 639 45. Waters AP. The ribosomal RNA genes of *Plasmodium*. *Adv Parasitol* 1994; **34**: 33–79.

- 640 46. Armache J-P, Jarasch A, Anger AM, Villa E, Becker T, Bhushan S, et al. Cryo-EM structure and  
641 rRNA model of a translating eukaryotic 80S ribosome at 5.5-Å resolution. *Proc Natl Acad Sci U*  
642 *S A* 2010; **107**: 19748–19753.
- 643 47. Greber BJ, Boehringer D, Montellese C, Ban N. Cryo-EM structures of Arx1 and maturation  
644 factors Rei1 and Jjj1 bound to the 60S ribosomal subunit. *Nat Struct Mol Biol* 2012; **19**: 1228–  
645 1233.
- 646 48. Savoia D. Plant-derived antimicrobial compounds: alternatives to antibiotics. *Future Microbiol*  
647 2012; **7**: 979–990.
- 648 49. Endo Y, Tsurugi K. The RNA N-glycosidase activity of ricin A-chain. The characteristics of the  
649 enzymatic activity of ricin A-chain with ribosomes and with rRNA. *J Biol Chem* 1988; **263**:  
650 8735–8739.
- 651 50. Sweeney R, Chen L, Yao MC. An rRNA variable region has an evolutionarily conserved  
652 essential role despite sequence divergence. *Mol Cell Biol* 1994; **14**: 4203–4215.
- 653 51. Parks MM, Kurylo CM, Dass RA, Bojmar L, Lyden D, Vincent CT, et al. Variant ribosomal  
654 RNA alleles are conserved and exhibit tissue-specific expression. *Sci Adv* 2018; **4**: eaao0665.
- 655 52. Krishnamoorthy R, Premalatha N, Karthik M, Anandham R, Senthilkumar M, Gopal NO, et al.  
656 Molecular markers for the identification and diversity analysis of arbuscular mycorrhizal fungi  
657 (AMF). *Fungal Biology* . 2017. , 177–199
- 658 53. Sanders IR, Alt M, Groppe K, Boller T, Wiemken A. Identification of ribosomal DNA  
659 polymorphisms among and within spores of the *Glomales*: application to studies on the genetic  
660 diversity of arbuscular mycorrhizal fungal communities. *New Phytologist* . 1995. , **130**: 419–427
- 661 54. LloydMacgilp SA, Chambers SM, Dodd JC, Fitter AH, Walker C, Young JPW. Diversity of the  
662 ribosomal internal transcribed spacers within and among isolates of *Glomus mosseae* and related  
663 mycorrhizal fungi. *New Phytol* 1996; **133**: 103–111.
- 664 55. Hosny M, Hijri M, Passerieux E, Dulieu H. rDNA units are highly polymorphic in *Scutellospora*  
665 *castanea* (Glomales, Zygomycetes). *Gene* 1999; **226**: 61–71.
- 666 56. Hijri M, Sanders IR. The arbuscular mycorrhizal fungus *Glomus intraradices* is haploid and has a  
667 small genome size in the lower limit of eukaryotes. *Fungal Genet Biol* 2004; **41**: 253–261.

- 668 57. Pawlowska TE, Taylor JW. Organization of genetic variation in individuals of arbuscular  
669 mycorrhizal fungi. *Nature* 2004; **427**: 733–737.
- 670 58. Chen ECH, Morin E, Beaudet D, Noel J, Yildirim G, Ndikumana S, et al. High intraspecific  
671 genome diversity in the model arbuscular mycorrhizal symbiont *Rhizophagus irregularis*. *New*  
672 *Phytol* 2018.
- 673 59. Locati MD, Pagano JFB, Girard G, Ensink WA, van Olst M, van Leeuwen S, et al. Expression of  
674 distinct maternal and somatic 5.8S, 18S, and 28S rRNA types during zebrafish development.  
675 *RNA* 2017; **23**: 1188–1199.
- 676 60. Hurst GDD. Extended genomes: symbiosis and evolution. *Interface Focus* 2017; **7**: 20170001.
- 677 61. Lagesen K, Hallin PF, Rødland E, Stærfeldt HH, Rognes T, Ussery DW. RNAmmer: consistent  
678 annotation of rRNA genes in genomic sequences. *Nucleic Acids Res* 2007; **35**: 3100–3108.
- 679 62. Katoh K, Standley DM. MAFFT multiple sequence alignment software version 7: improvements  
680 in performance and usability. *Mol Biol Evol* 2013; **30**: 772–780.
- 681 63. Huson DH, Bryant D. Application of phylogenetic networks in evolutionary studies. *Mol Biol*  
682 *Evol* 2006; **23**: 254–267.
- 683 64. Nguyen L-T, Schmidt HA, von Haeseler A, Minh BQ. IQ-TREE: a fast and effective stochastic  
684 algorithm for estimating maximum-likelihood phylogenies. *Mol Biol Evol* 2015; **32**: 268–274.
- 685 65. Reuter JS, Mathews DH. RNAstructure: software for RNA secondary structure prediction and  
686 analysis. *BMC Bioinformatics* 2010; **11**: 129.
- 687 66. Nakagawa T, Kaku H, Shimoda Y, Sugiyama A, Shimamura M, Takanashi K, et al. From  
688 defense to symbiosis: limited alterations in the kinase domain of LysM receptor-like kinases are  
689 crucial for evolution of legume-*Rhizobium* symbiosis. *Plant J* 2011; **65**: 169–180.
- 690



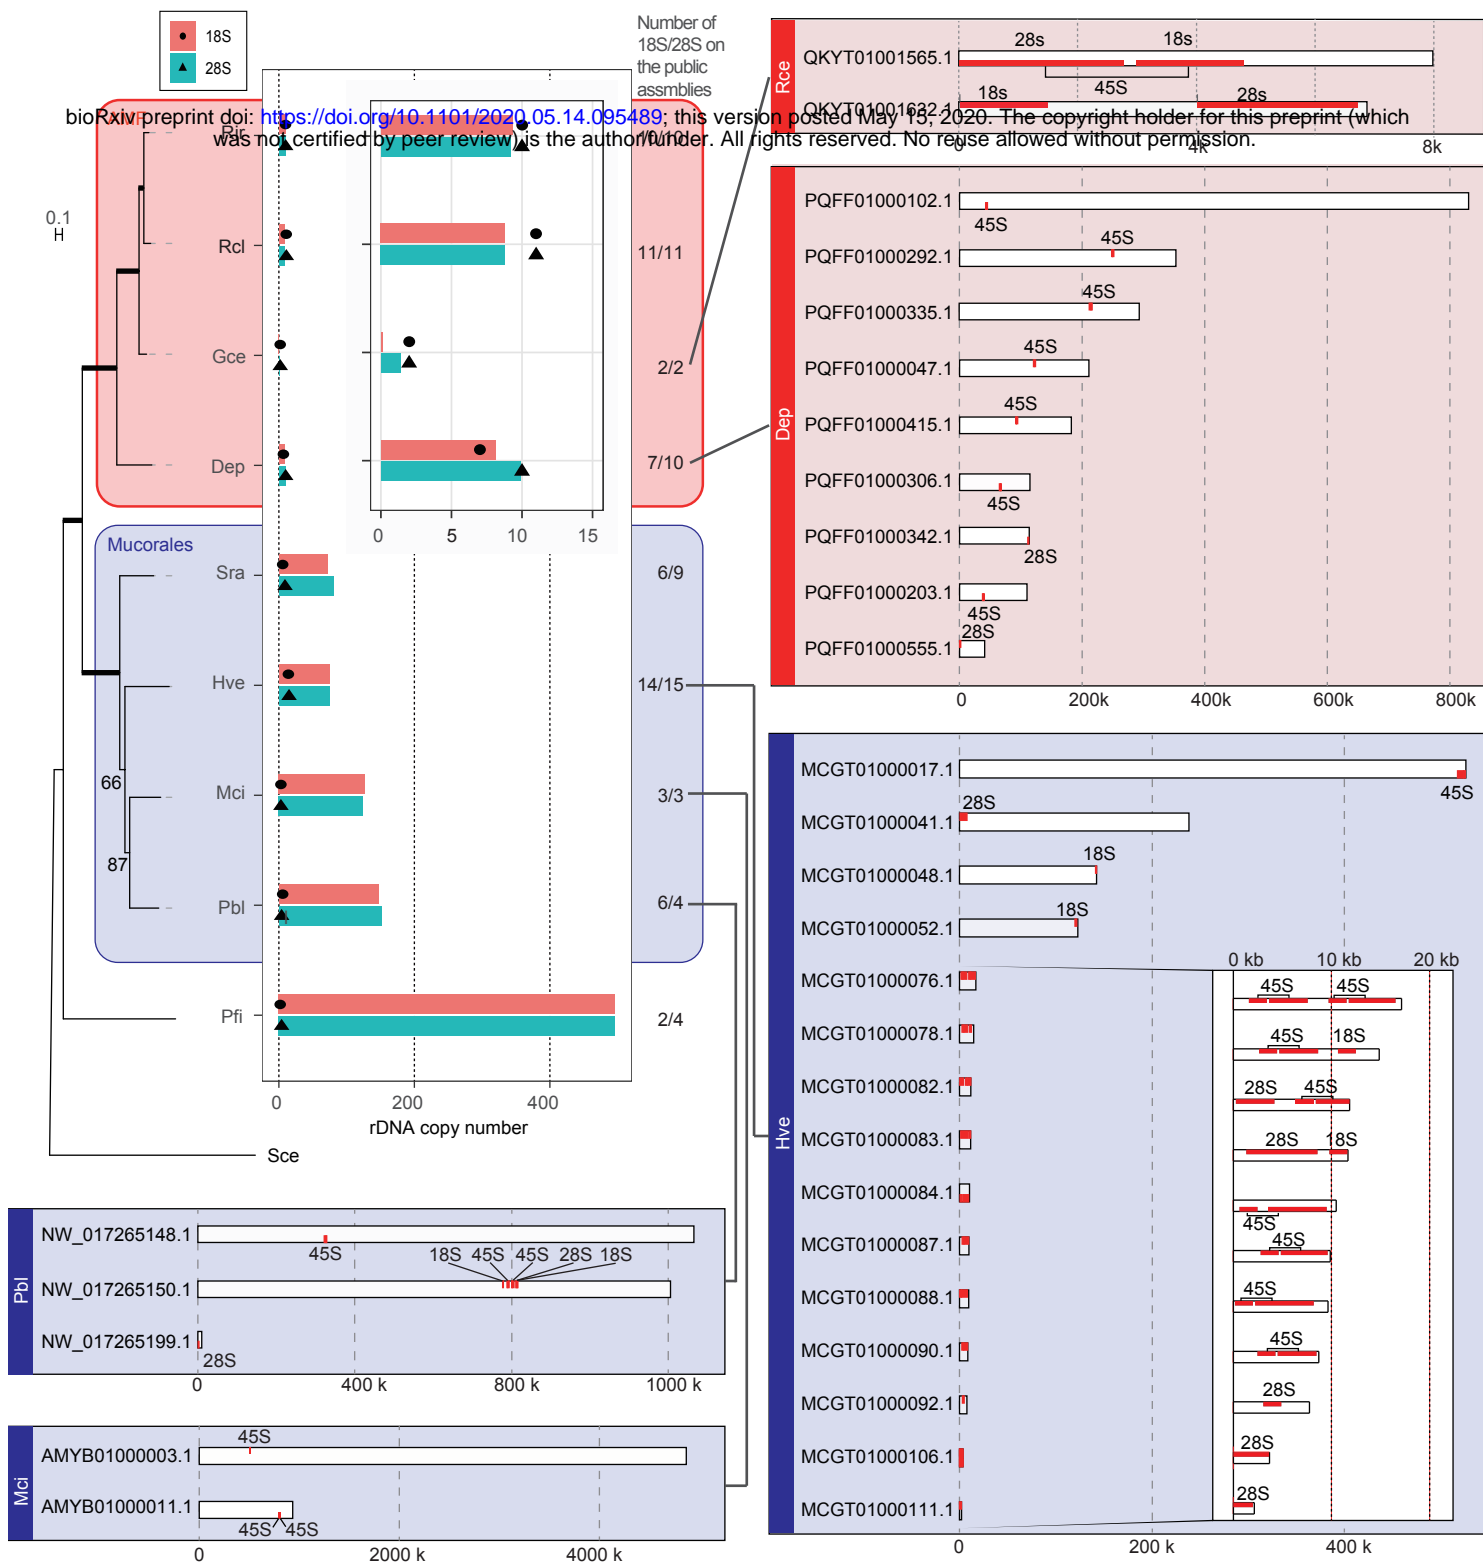

Fig. 2



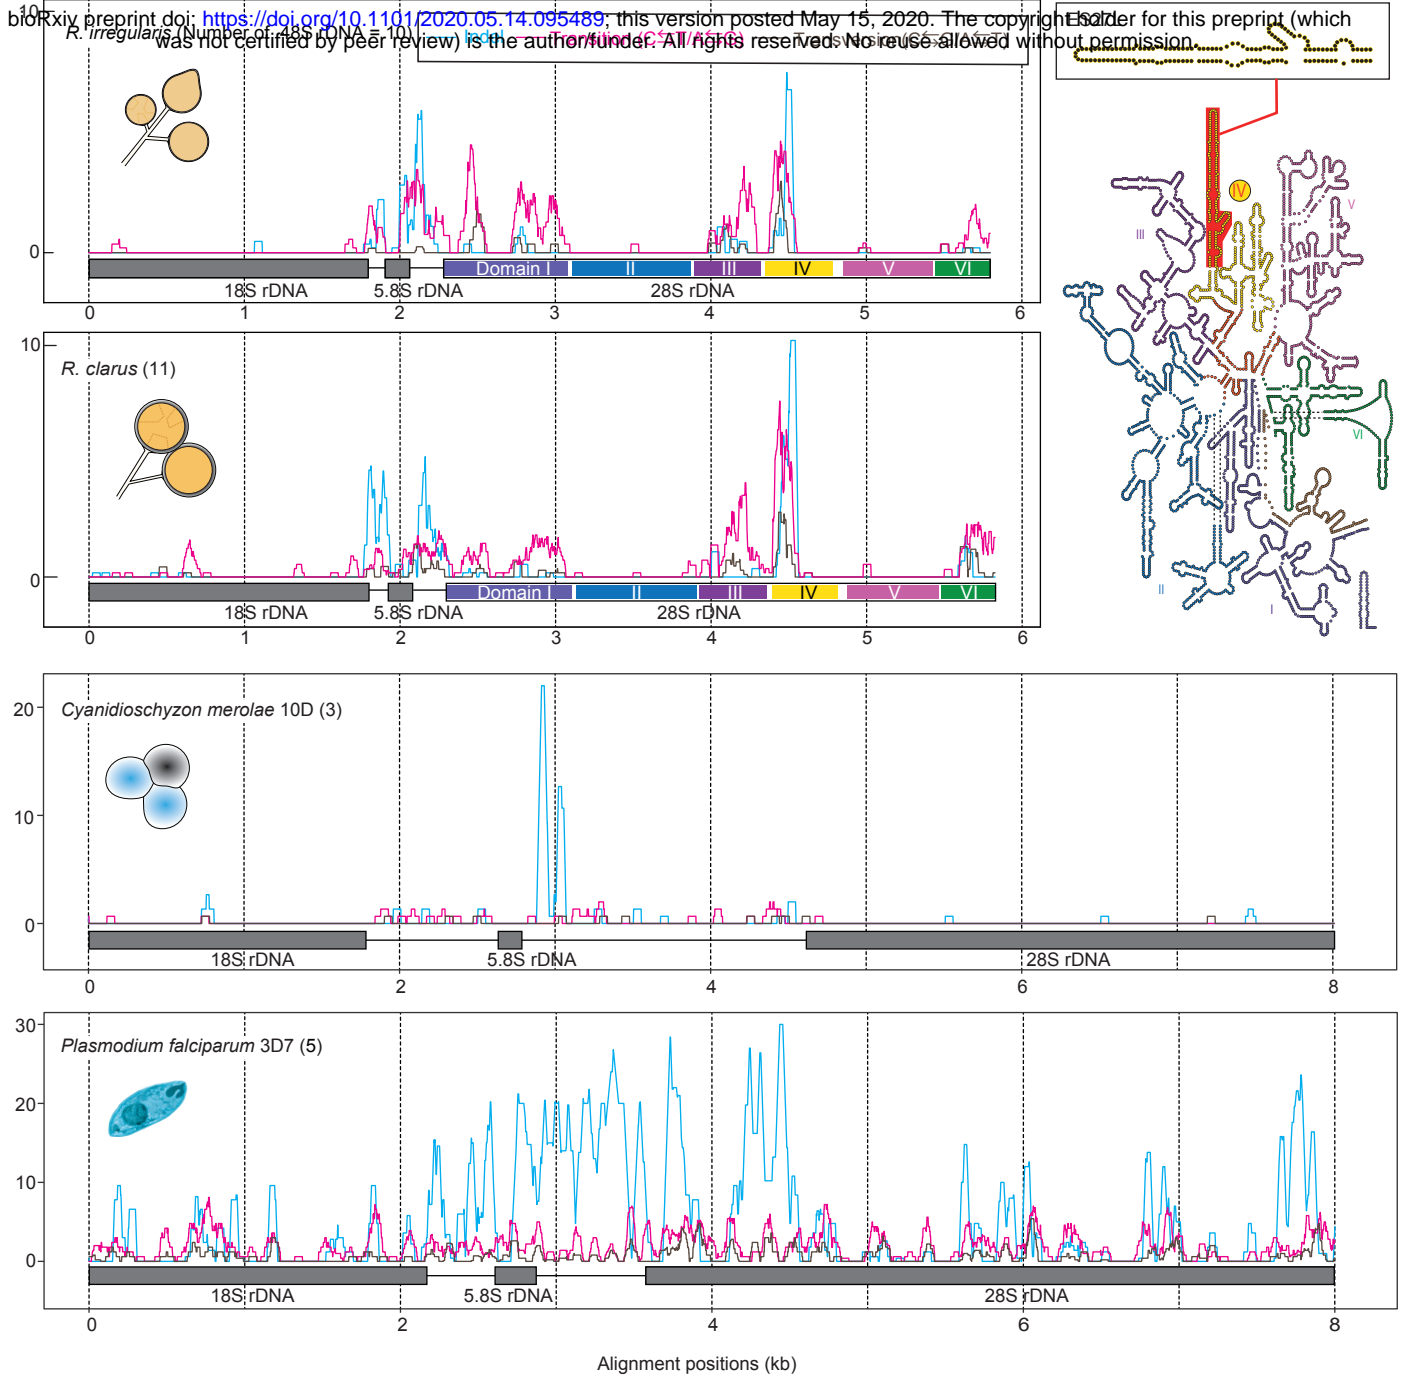

Fig. 3

a

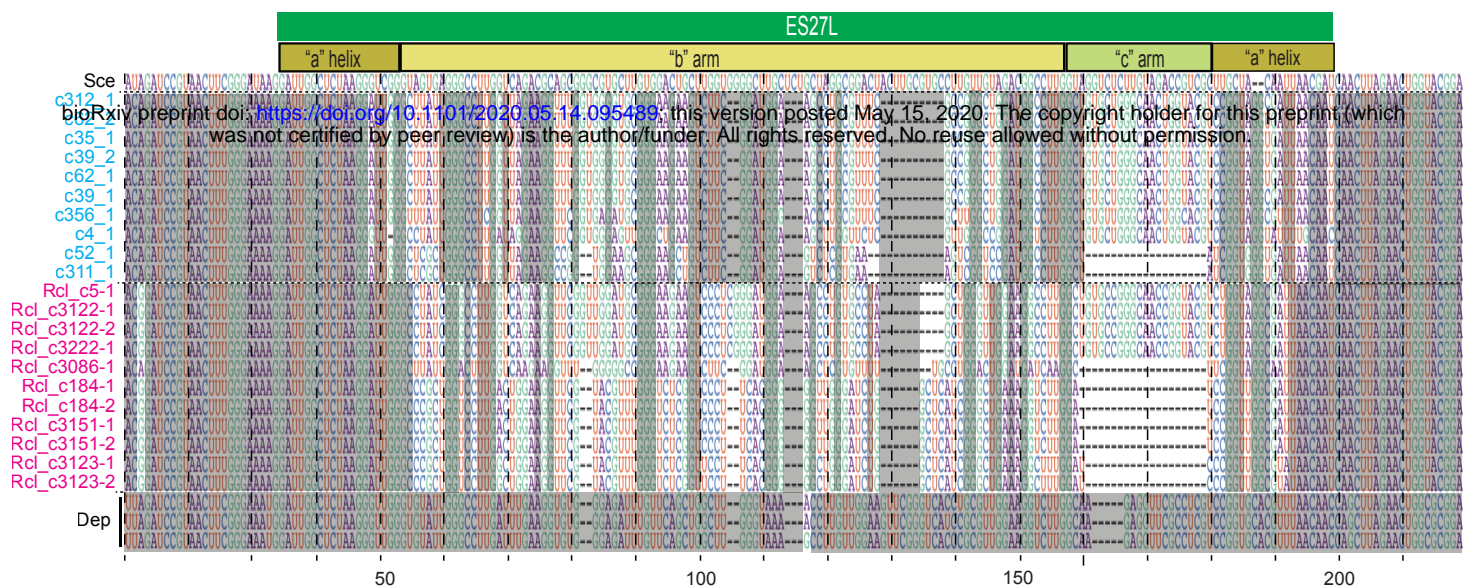

b

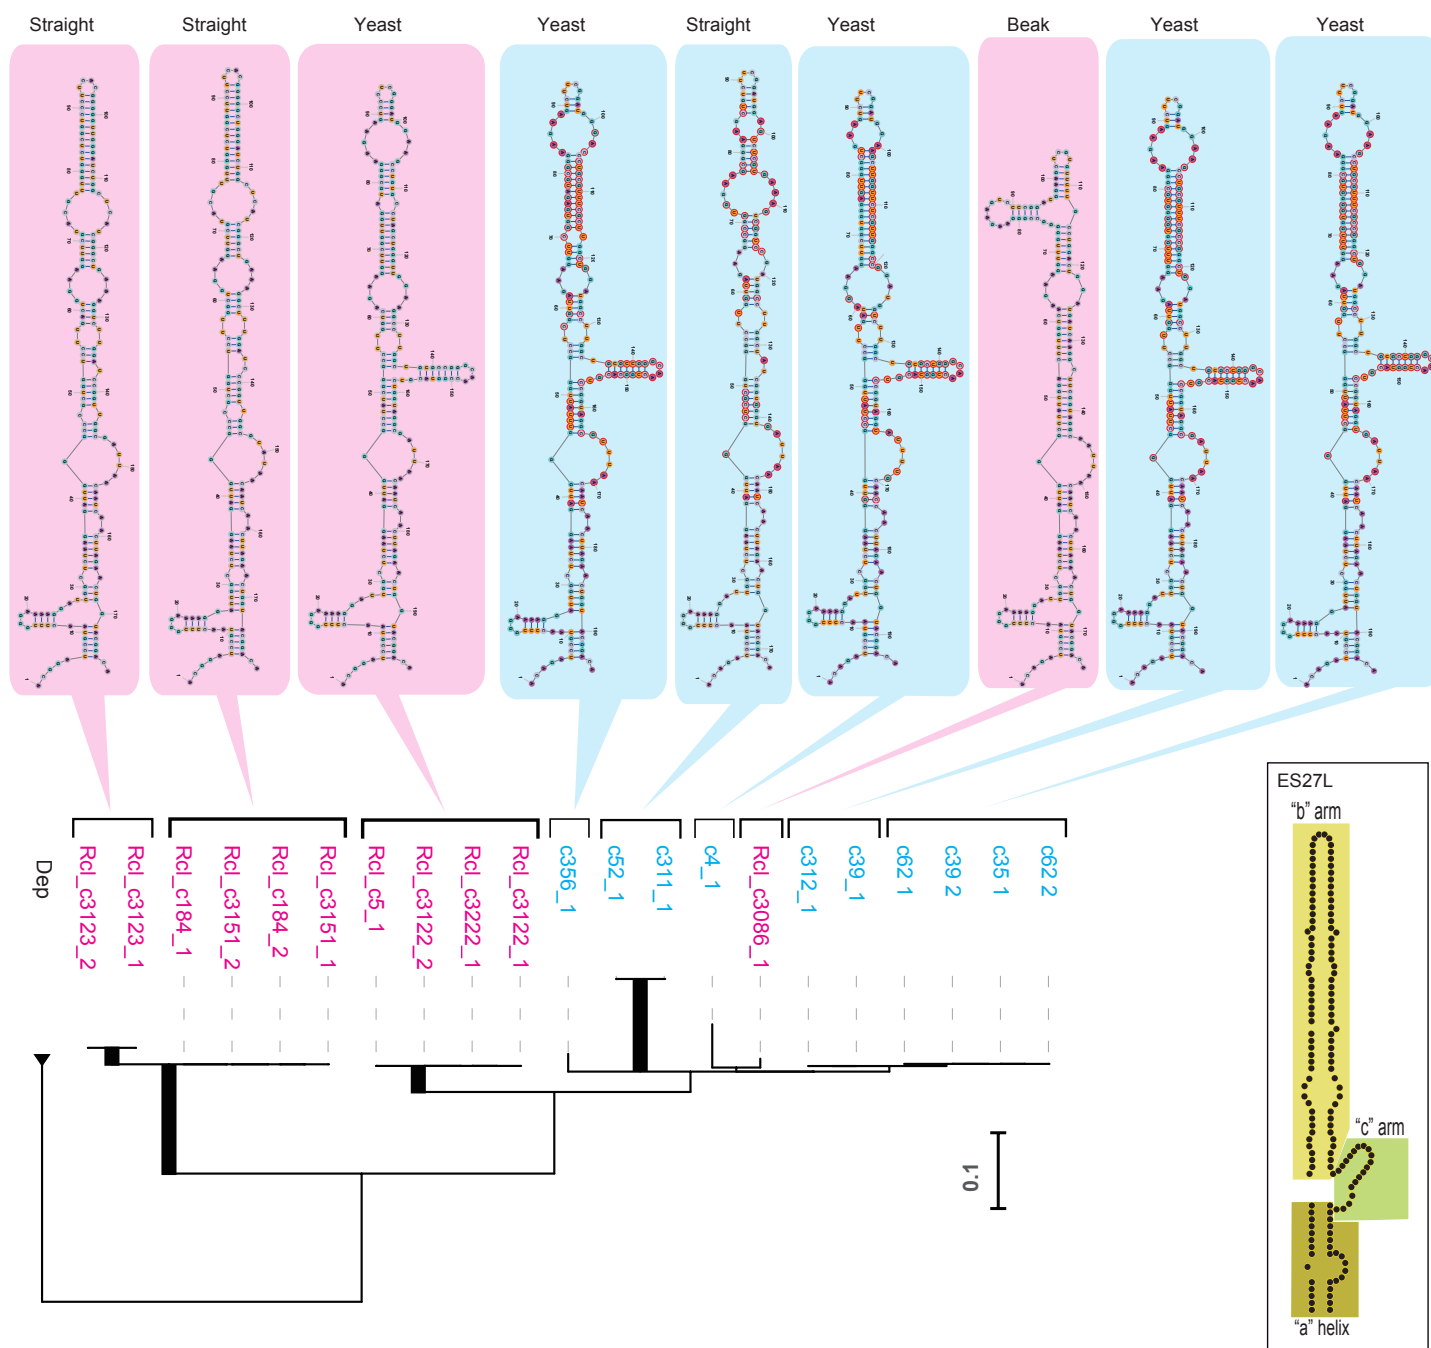

Fig. 4

A

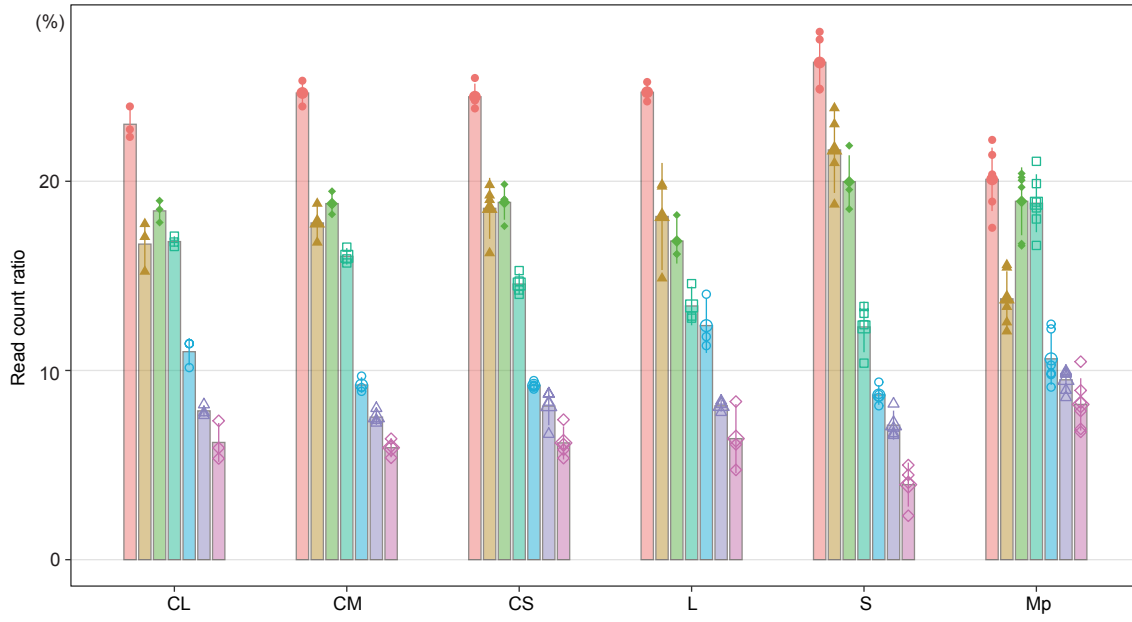

B

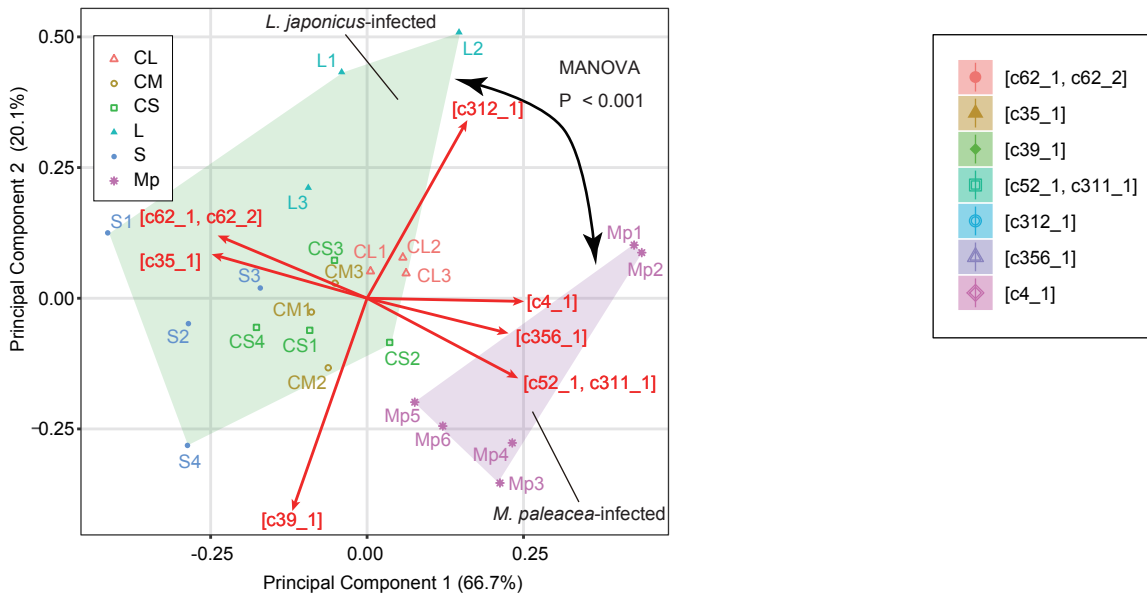

Fig. 5
